# Supplementary material
Source: publisher figshare collection journal article supplement (https://acs.figshare.com/ndownloader/files/3719206)
Supplement: Supplementary file 1 [file 3719206]

## ***Supporting Information***

# Fluorescent and Colorimetric Dual-Readout Assay for Inorganic Pyrophosphatase with $\text{Cu}^{2+}$ -Triggered Oxidation of o-Phenylenediamine

*Jian Sun<sup>†</sup>, Bin Wang<sup>‡</sup>, Xue Zhao<sup>†,§</sup>, Zong-Jun Li<sup>†</sup>, and Xiurong Yang<sup>\*†</sup>*

<sup>†</sup>State Key Laboratory of Electroanalytical Chemistry, Changchun Institute of Applied Chemistry,  
Chinese Academy of Sciences, Changchun, Jilin 130022, China

<sup>‡</sup>School of Material Science and Engineering, Tianjin University, Tianjin 300072, China

<sup>§</sup>University of Chinese Academy of Sciences, Beijing 100039, China

\*E-mail: [xryang@ciac.ac.cn](mailto:xryang@ciac.ac.cn); Fax: +86 431 85689278

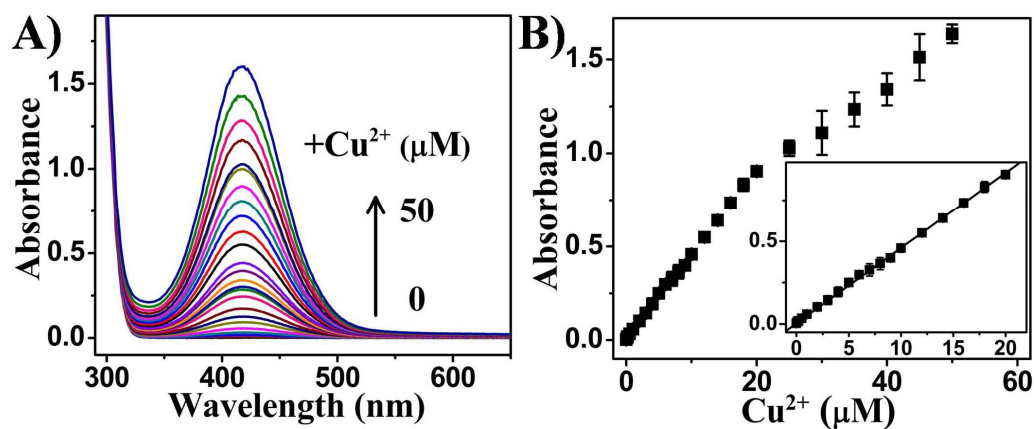

**Figure S1.** (A) Absorption spectra of the OPD (1 mM) solution in Tris-HCl buffer (10 mM, pH 7.4) in addition of varied concentrations of  $\text{Cu}^{2+}$  (0–50  $\mu\text{M}$ ). (B) The absorbance values at 417 nm for the analytical solution versus the  $\text{Cu}^{2+}$  concentrations. Inset: linear curve.

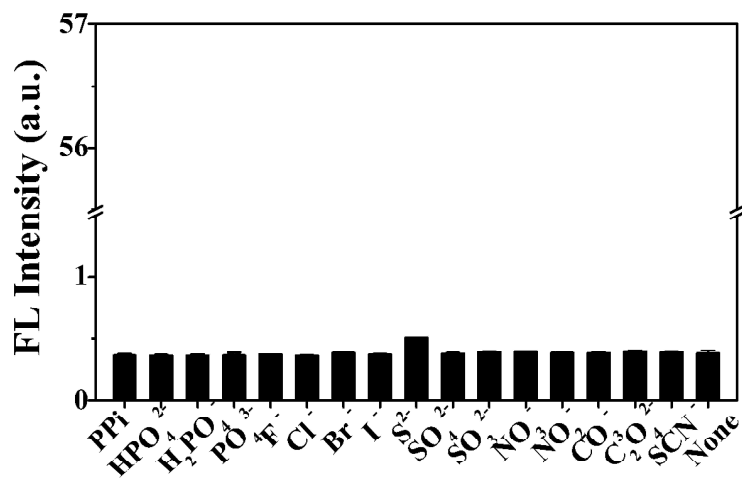

**Figure S2.** The fluorescence intensities at 560 nm of the OPD (1 mM) solution in Tris-HCl buffer (10 mM, pH 7.4) by adding different inorganic anions (10  $\mu\text{M}$ ).

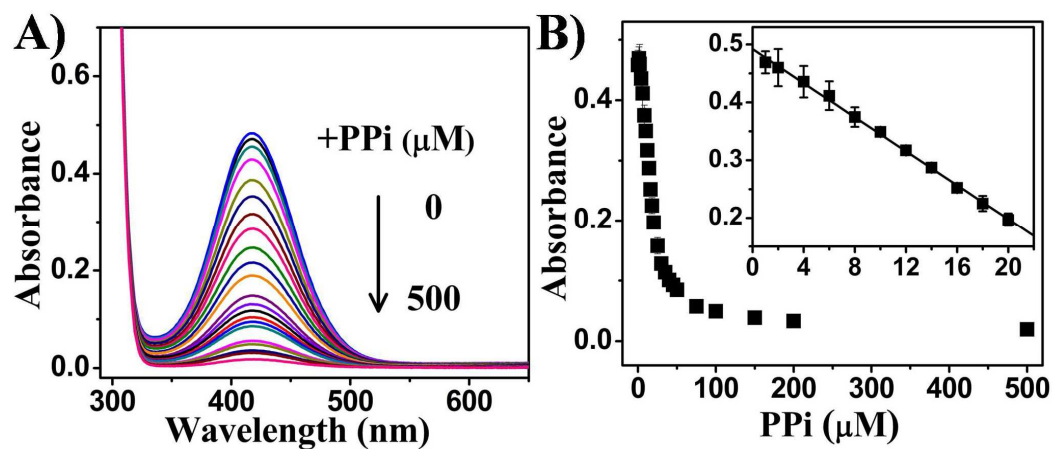

**Figure S3.** (A) Absorption spectra of the analytical solution prepared by adding the mixture of  $\text{Cu}^{2+}$  and varied concentrations of PPI (0–500  $\mu\text{M}$ ) into Tris-HCl buffer (10 mM, pH 7.4) containing OPD (1 mM). (B) The absorbance values at 417 nm for the analytical solution versus the PPI concentrations. Inset: linear curve.

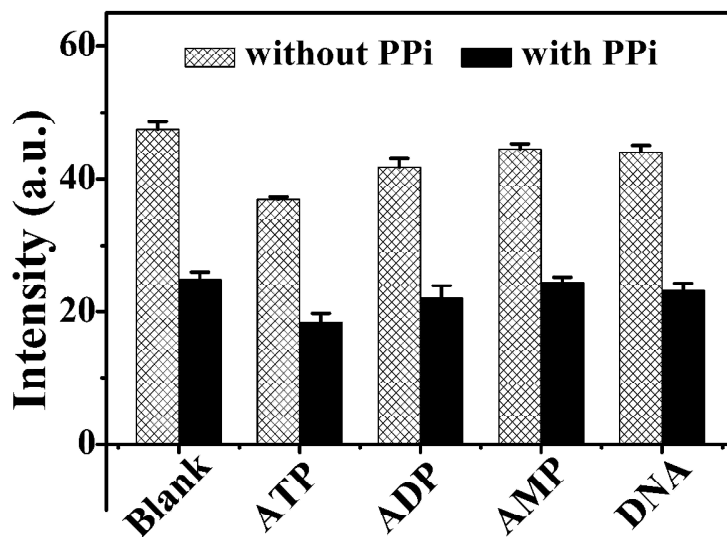

**Figure S4.** The fluorescence intensities of the OPD– $\text{Cu}^{2+}$  system in the presence of the control biomolecules (50  $\mu\text{M}$  of ATP, ADP, AMP and 50  $\mu\text{g/mL}$  of fish sperm DNA) without and with the coexistence of PPI ions (20  $\mu\text{M}$ ).

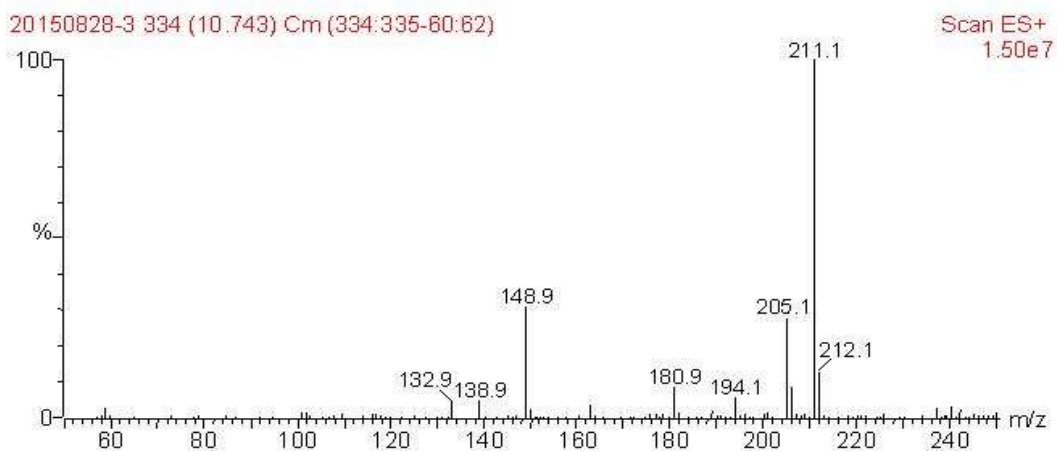

**Figure S5.** The ESI-MS spectrometry of the final as-purified product of the incubated mixture solution of  $\text{Cu}^{2+}$  and OPD (OPDox).

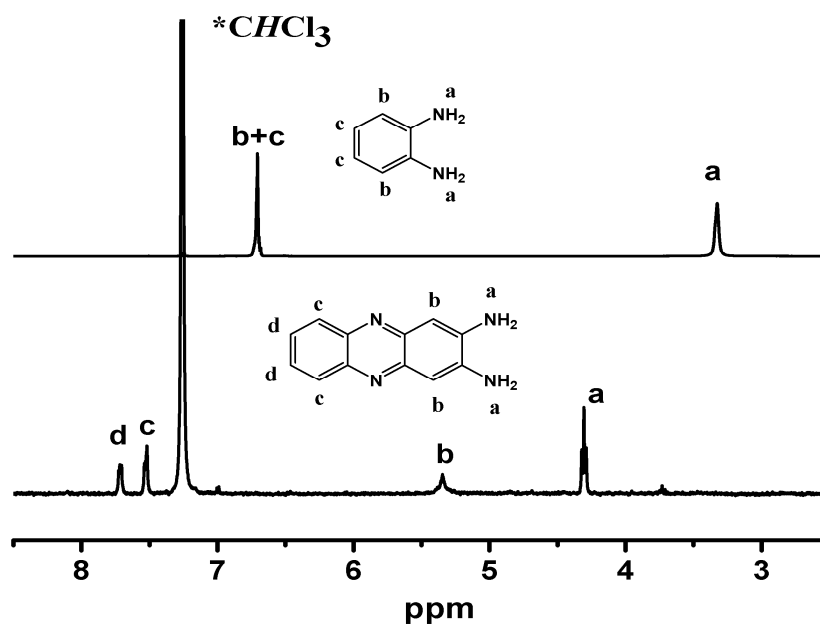

**Figure S6.** The  $^1\text{H}$  NMR spectrometry of OPD and the final as-purified product of the incubated mixture solution of  $\text{Cu}^{2+}$  and OPD (OPDox).

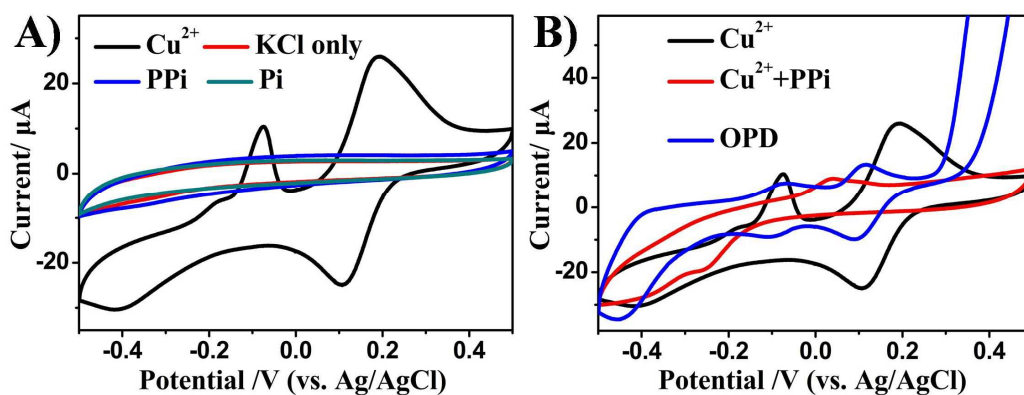

**Figure S7.** (A) Cyclic voltammograms of the  $\text{CuSO}_4$  (black), blank (red), PPI (blue), and Pi (green), respectively, in KCl solution. (B) Cyclic voltammograms of the  $\text{CuSO}_4$  (black),  $\text{CuSO}_4$  in presence of PPI (red), and OPD (blue), respectively, in KCl solution.

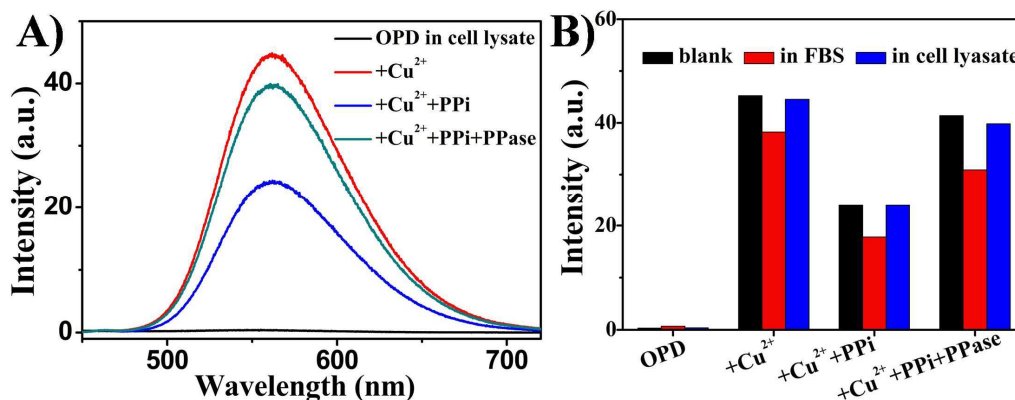

**Figure S8.** (A) Fluorescence spectra of the OPD (black), OPD +  $\text{Cu}^{2+}$  (red), OPD +  $\text{Cu}^{2+}$  + PPI (blue), and OPD +  $\text{Cu}^{2+}$  + PPI + PPase (green) in 2% 3T3L1 cell lysate. (B) The fluorescence intensities of the OPD, OPD +  $\text{Cu}^{2+}$ , OPD +  $\text{Cu}^{2+}$  + PPI, and OPD +  $\text{Cu}^{2+}$  + PPI + PPase in the standard assay system (black), the 2% fetal bovine serum (red) and the 2% 3T3L1 cell lysate (blue).
